# Supplementary material for: The clinical use of circulating microRNAs as non-invasive diagnostic biomarkers for lung cancers
Source: PubMed Central journal article supplement (PMC5685742; doi:10.18632/oncotarget.21644), 2017-10-04
Supplement: oncotarget-08-90197-s001.pdf [file oncotarget-08-90197-s001.pdf]

# The clinical use of circulating microRNAs as non-invasive diagnostic biomarkers for lung cancers

## SUPPLEMENTARY MATERIALS

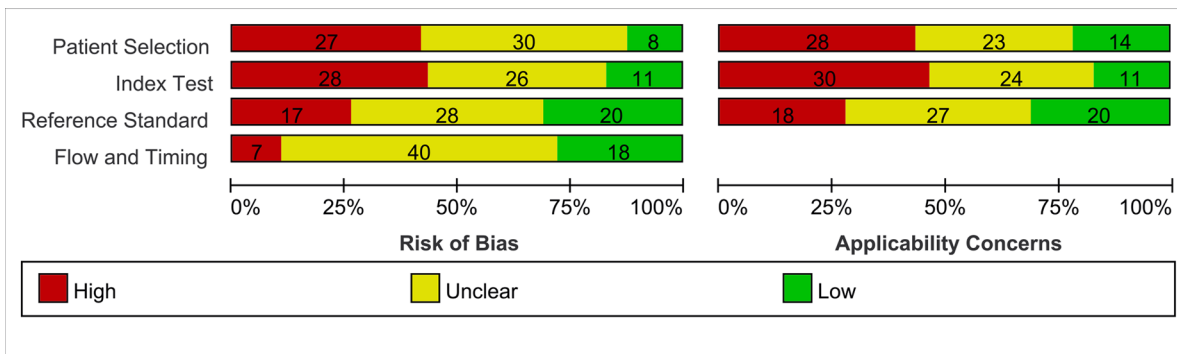

Supplementary Figure 1: Methodological quality graph of included studies.

**Supplementary Table 1: The main characteristics of included studies.**

See Supplementary File 1
